# Supplementary material for: High capacity all-solid-state lithium battery enabled by in situ formation of an ionic conduction path by lithiation of MgH2
Source: Royal Society of Chemistry journal article supplement (doi:10.1039/d2ra01199a), 2022-01-01
Supplement: d2ra01199a1.pdf [file d2ra01199a1.pdf]

Supporting Information for

**High Capacity All-Solid-State Lithium Battery Enabled by *In Situ* Formation of Ionic Conduction Path by Lithiation of MgH<sub>2</sub>**

Atsushi Inoishi,<sup>\*a</sup> Hiroki Sato,<sup>b</sup> Yixin Chen,<sup>b</sup> Hikaru Saito,<sup>a</sup> Ryo Sakamoto,<sup>a</sup> Hikari Sakaebe<sup>a</sup> and Shigeto Okada<sup>a</sup>

<sup>a</sup> Institute for Materials Chemistry and Engineering, Kyushu University

Kasuga-Koen 6-1, Kasuga-shi, Fukuoka 816-8580, Japan

E-mail: inoishi@cm.kyushu-u.ac.jp

<sup>b</sup> Interdisciplinary Graduate School of Engineering Sciences, Kyushu University

Kasuga-Koen 6-1, Kasuga-shi, Fukuoka 816-8580, Japan

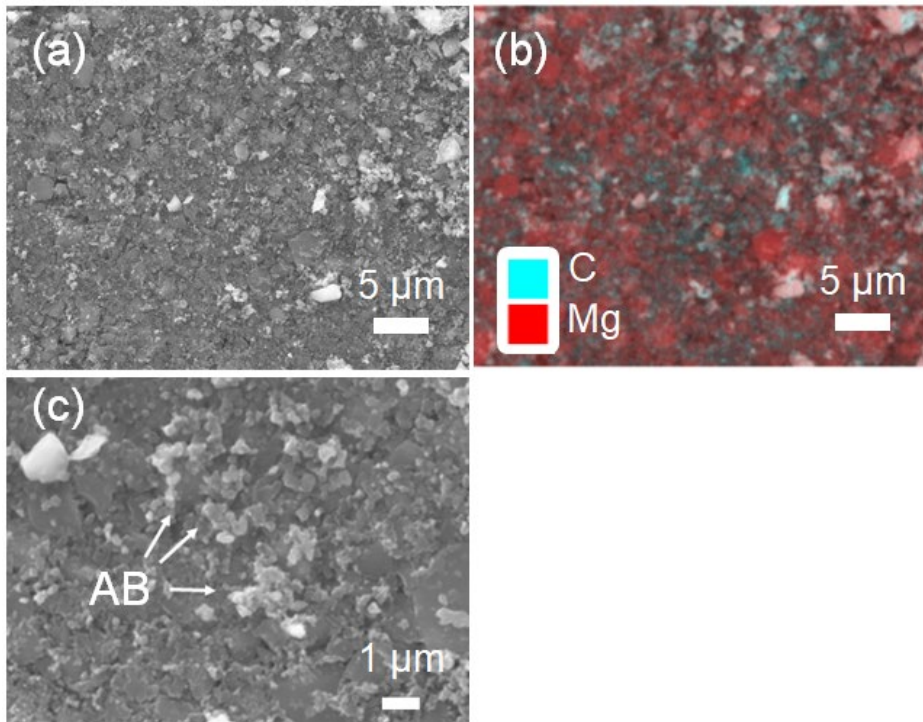

**Figure S1.** SEM images and EDS mapping results for electrode mixture pressed at 320 MPa. The electrode mixtures without  $\text{LiBH}_4$  ( $\text{MgH}_2:\text{AB} = 70:30$ ) were pressed at 320 MPa. SEM images (Fig. S1a) and an EDS map (Figs. S1b) are displayed. An SEM image at higher magnification (10,000×) is displayed in Fig. S1c.

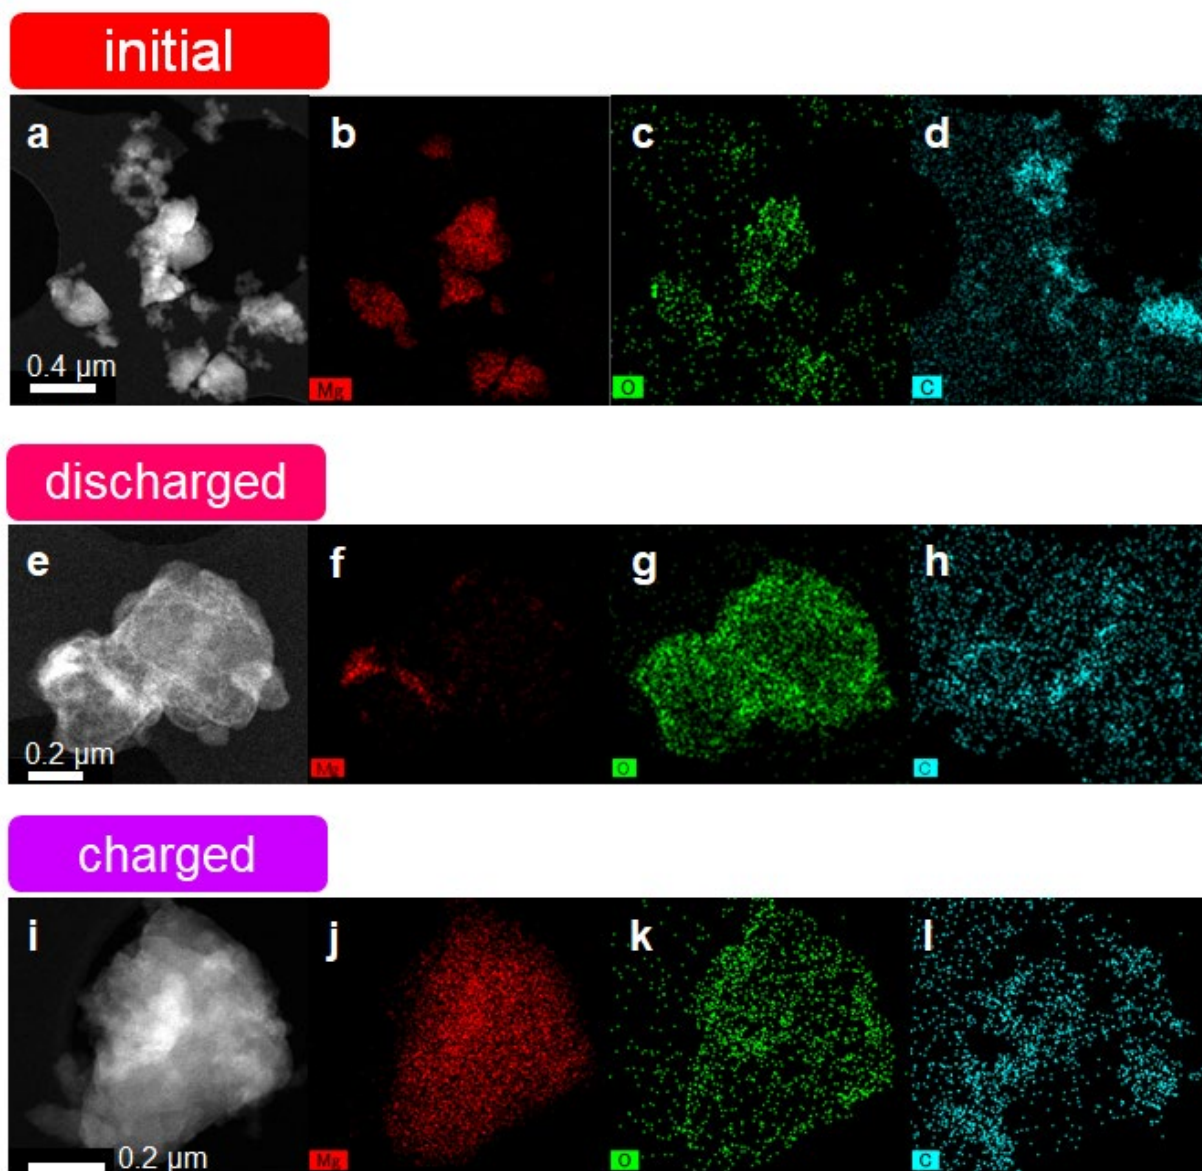

**Figure S2.** EDS analysis results for (a–d) initial  $\text{MgH}_2$  and AB composite powders, (e–h) discharged state, and (i–l) charged state. For all the states, ADF-STEM images (Fig. S2a, S2e, and S2i), Mg maps (Figs. S2b, S3f, and S2j), O maps (Figs. S2c, S2g, and S2k), and C maps (Figs. S2d, S2h, and S2l) are displayed in this order.

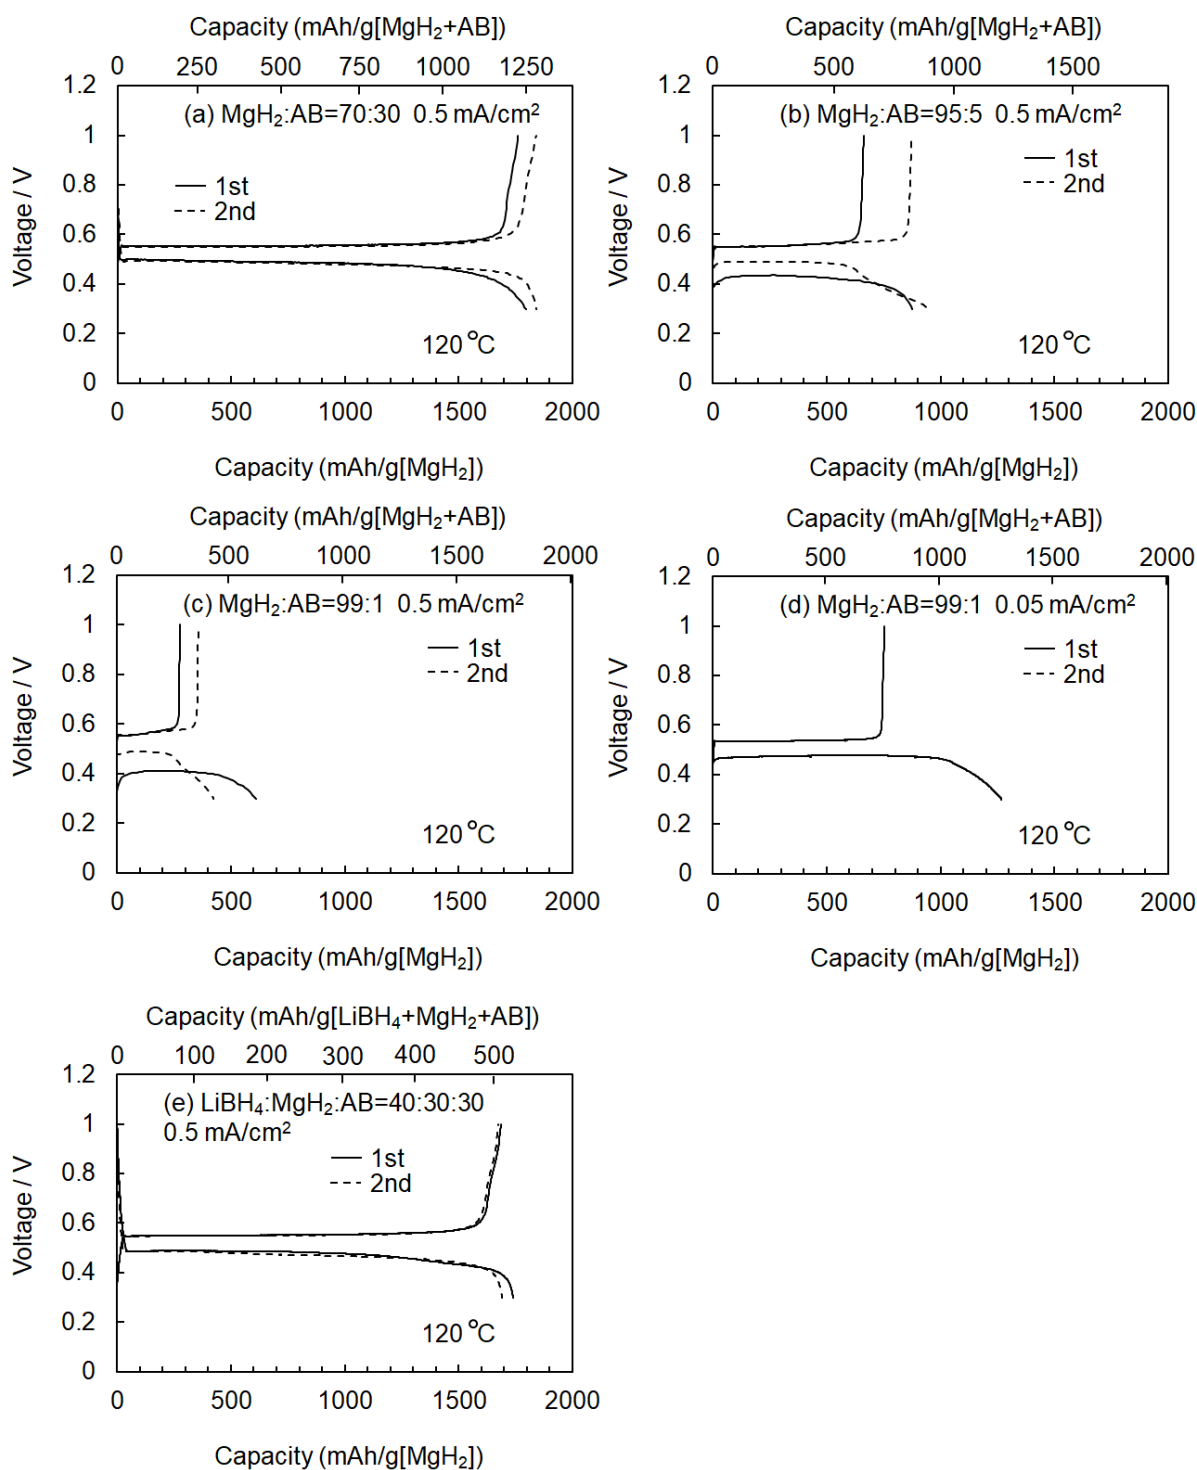

**Figure S3.** Discharge (lithiation)–charge (delithiation) curves for cells with different electrode compositions: (a) composition  $\text{MgH}_2\text{:AB} = 70\text{:}30$ , current density  $0.5 \text{ mA/cm}^2$ ; (b) composition  $\text{MgH}_2\text{:AB} = 95\text{:}5$ , current density  $0.5 \text{ mA/cm}^2$ ; (c) composition  $\text{MgH}_2\text{:AB} = 99\text{:}1$ , current density  $0.5 \text{ mA/cm}^2$ ; (d) composition  $\text{MgH}_2\text{:AB} = 99\text{:}1$ , current density  $0.05 \text{ mA/cm}^2$ ; and (e) composition  $\text{LiBH}_4\text{:MgH}_2\text{:AB} = 40\text{:}30\text{:}30$ , current density  $0.5 \text{ mA/cm}^2$ .
